# Supplementary material
Source: MDPI journal article supplement (https://www.mdpi.com/2073-4344/8/2/53)
Supplement: s1 [file s1]

Supporting Information

# Carbon-Supported Copper-Based Nitrogen-Containing Supramolecule as an Efficient Oxygen Reduction Reaction Catalyst in Neutral Medium

Yuanyuan Zhao <sup>1</sup>, Ya Chu <sup>1</sup>, Xiuping Ju <sup>2</sup>, Jinsheng Zhao <sup>1,\*</sup>, Lingqian Kong <sup>2</sup> and Yan Zhang <sup>1</sup>

<sup>1</sup> Department of Chemistry, Liaocheng University, Liaocheng 252059, China; zhaoyuanldfx@163.com (Y.Z.); chuyaya19950621@126.com (Y.C.); zhang\_yan1219@126.com (Y.Z.)

<sup>2</sup> Dongchang College, Liaocheng University, Liaocheng 252059, China; jxp1127@163.com (X.J.); lingqiankong@126.com (L.K.)

\* Correspondence: j.s.zhao@163.com; Tel.: +86-635-853-9607

## 1. Molecular weight measurement

The molecular weight of Cu-SOCBP metallo-supramolecular polymer was determined by SEC-viscometry-RALLS (size exclusion chromatography-viscometry-right angle light scattering solvent) system consisting of a pump, solvent degasser, liquid chromatograph, refractive index detector, column oven, viscotek 270 dual detector. The eluent was acetonitrile at flow speed of 1 mL/min. The column temperature was 30 °C. The obtained Cu-SOCBP polymer ( $c=1.0$  mg/mL) shows weight-average molecular weight ( $M_w=6.5\times 10^6$  Da) and polydispersity index (PDI,  $M_w/M_n=1.15$ ), using polyethylene oxide-PEO-22K was standard, when 20 mL of acetonitrile solution was injected into the liquid chromatograph.

## 2. The ORR activity of Vulcan XC-72 carbon powder.

The carbon modified electrode was prepared by the same procedure as the Pt/carbon modified electrode, except that the Pt/carbon was replaced by Vulcan XC-72 carbon.

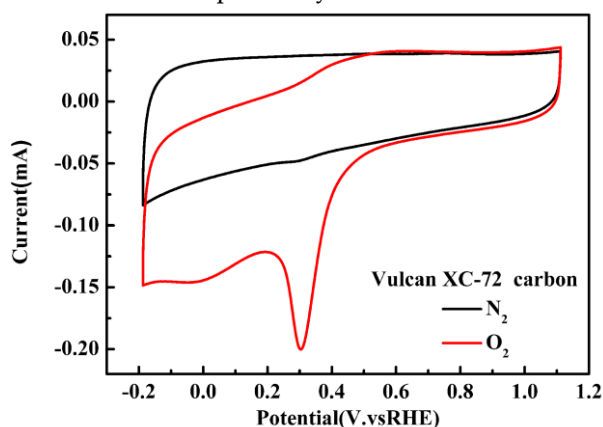

**Fig.S1.** CV of Vulcan XC-72 modified electrode in PBS solution saturated with N<sub>2</sub> or O<sub>2</sub>. scan rate: 100 mV/s.

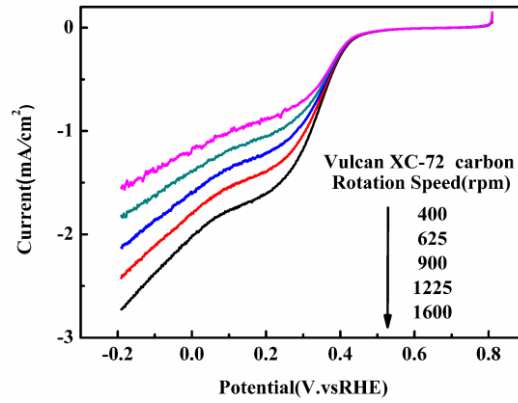

Fig.S2. Polarization curves of Vulcan XC-72 modified electrode at different rotating rates in  $O_2$  saturated electrolyte.

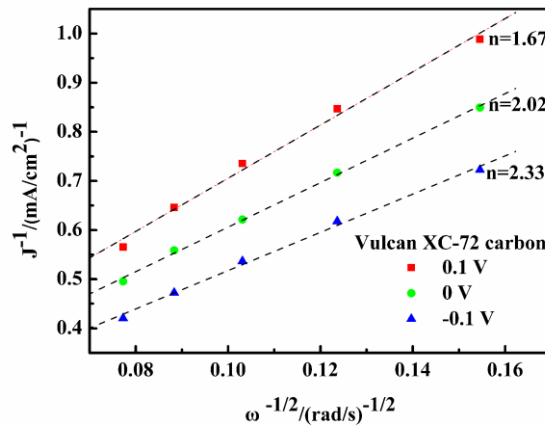

Fig.S3. The K-L plots of Vulcan XC-72 carbon modified electrode at the potentials of 0.1 V, 0.0 V, and -0.1 V, respectively.

## 2. RRDE measurements of the Pt/C electrolyte

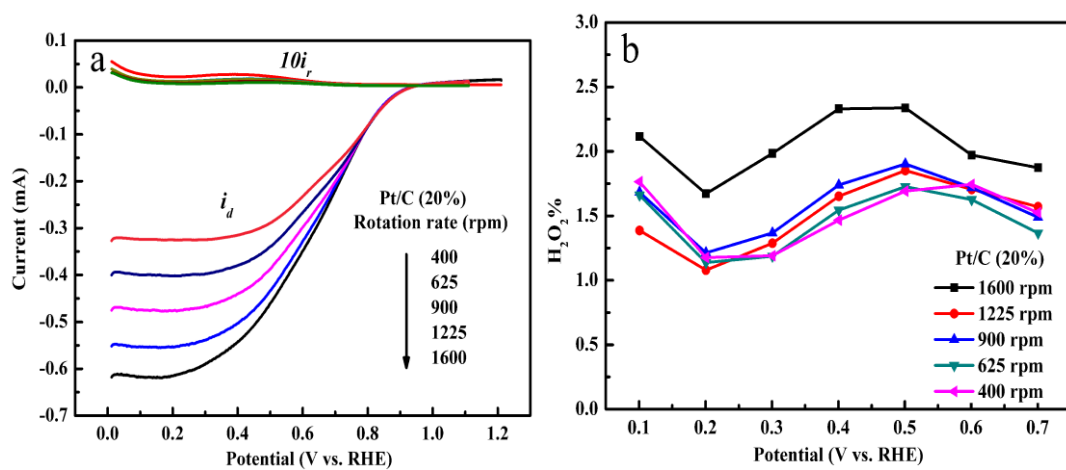

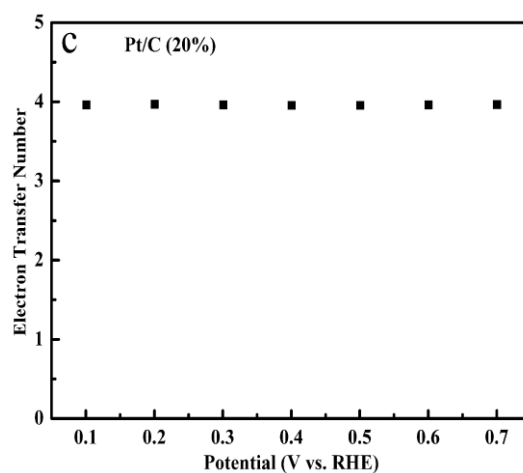

Fig. S4. RRDE curves (a), the yield of H<sub>2</sub>O<sub>2</sub> (%) (b), and electron transfer number (c) of Pt/C (20%).

Table S1. The fitting equations and the values of R<sup>2</sup> in the K-L plots of the catalysts.

| Catalysts and applied potential |          | Fitting equation     | The values of R <sup>2</sup> |
|---------------------------------|----------|----------------------|------------------------------|
| Cu-SOCP/C                       | + 0.41 V | $y=0.21936+2.17982x$ | 0.999                        |
|                                 | + 0.36 V | $y=0.1307+2.43089x$  | 0.999                        |
|                                 | + 0.31 V | $y=0.0929+2.49823x$  | 0.999                        |
|                                 | + 0.26 V | $y=0.06917+2.53913x$ | 0.9997                       |
| Pt/C                            | + 0.4 V  | $y=0.03483+2.27584x$ | 0.999                        |
|                                 | + 0.3 V  | $y=0.03483+2.27584x$ | 0.999                        |
|                                 | + 0.2V   | $y=0.01883+2.37696x$ | 0.9997                       |
